# Supplementary material for: Recessive Resistance Derived from Tomato cv. Tyking-Limits Drastically the Spread of Tomato Yellow Leaf Curl Virus
Source: MDPI journal article supplement (doi:10.3390/v7052518), 2015-05-21
Supplement: s1 [file s1]

## Supplementary Figure

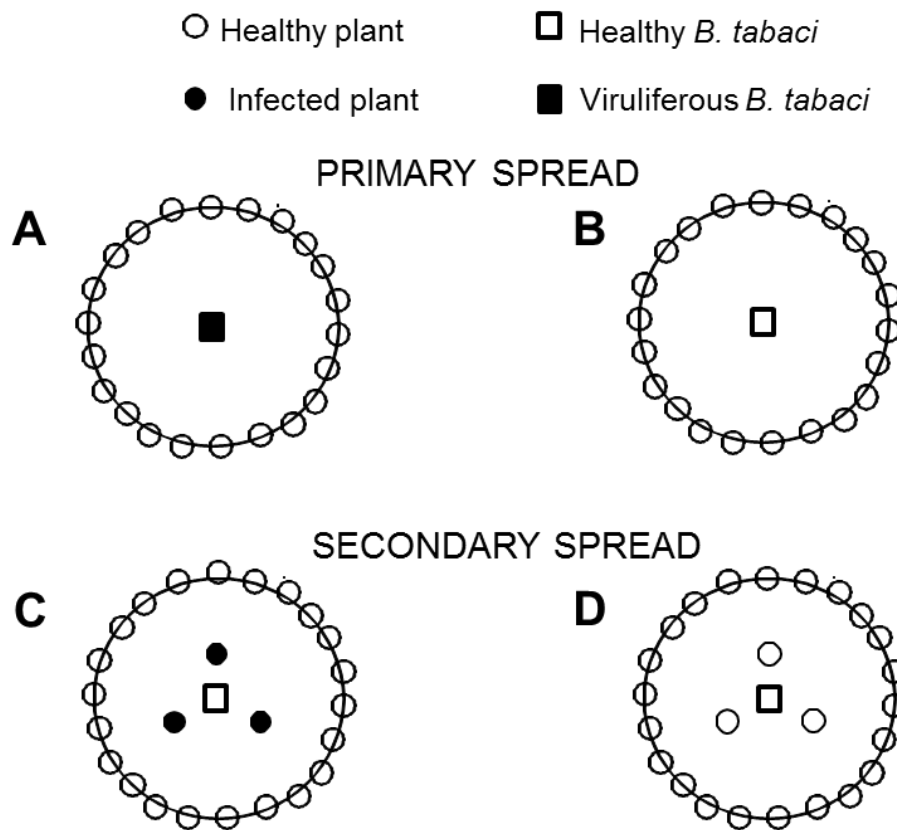

**Supplementary Figure 1.** Schematic representation of primary and secondary spread experimental design. For primary spread (A) of an isolate of the strain IL of Tomato yellow leaf curl virus (TYLCV-IL), viruliferous *Bemisia tabaci* adult individuals (15 whiteflies per test plant) were released in the centre of a circle (2 m diameter) of 22 healthy test plants. For secondary spread (C) from virus source plants, three TYLCV-IL-infected plants were placed forming a triangle (with 60 cm between each of the three plants) in the centre of a circle (2 m diameter) of 22 healthy test plants. Healthy *B. tabaci* adult individuals (30 whiteflies per test plant) were then released in the centre of the triangle of virus-source plants. Control experiment were conducted using healthy whiteflies for primary spread (B) and healthy source plants for secondary spread (D). Open and filled circles indicate healthy or TYLCV-infected plants, respectively. Open and filled squares indicate healthy or TYLCV-IL viruliferous whiteflies, respectively.
